# Supplementary material
Source: MDPI journal article supplement (https://www.mdpi.com/2673-4141/3/4/32)
Supplement: s1 [file s1]

---

# Supplementary Materials: Aluminum Cation Doping in Rud-

## dlesden-Popper $\text{Sr}_2\text{TiO}_4$

### Enables High-Performance Photocatalytic

### Hydrogen Evolution

Jingsheng He <sup>1,†</sup>, Xiao Han <sup>1,†</sup>, Huimin Xiang <sup>1</sup>, Ran Ran <sup>1</sup>, Wei Wang <sup>1,\*</sup>, Wei Zhou <sup>1</sup> and Zongping Shao <sup>2,\*</sup>

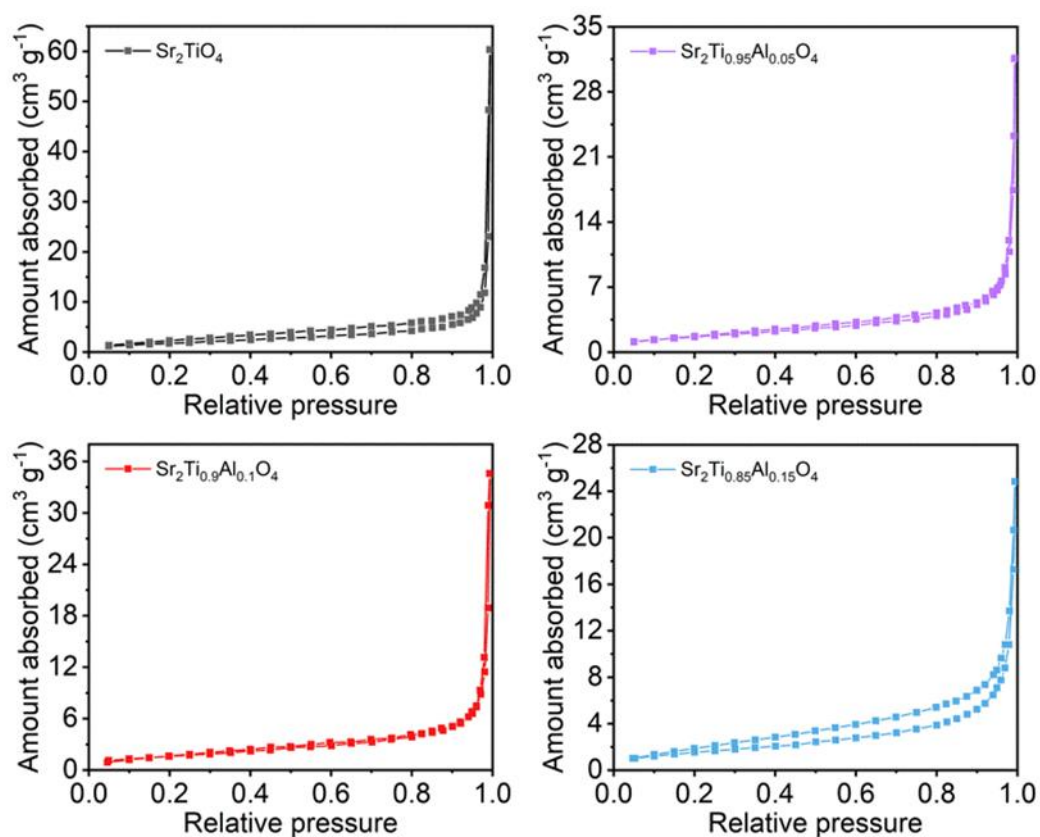

**Figure S1.**  $\text{N}_2$  adsorption and desorption curves of  $\text{Sr}_2\text{Ti}_{1-x}\text{Al}_x\text{O}_4$  ( $x = 0, 0.05, 0.1$  and  $0.15$ ).

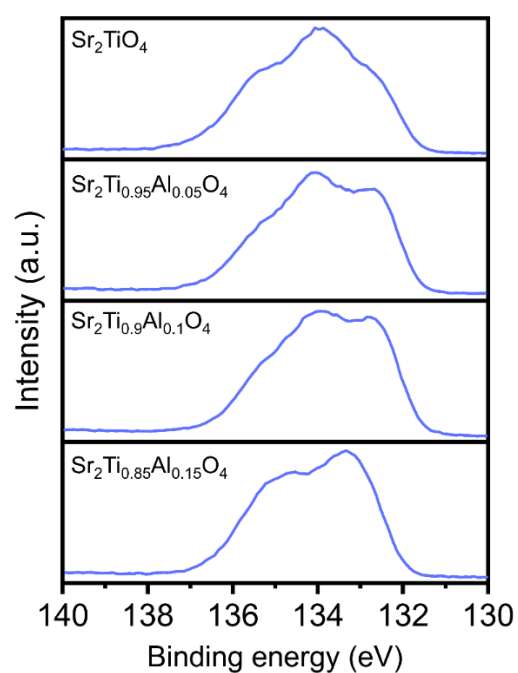

**Figure S2.** Sr 3d XPS spectra of  $\text{Sr}_2\text{Ti}_{1-x}\text{Al}_x\text{O}_4$  ( $x = 0, 0.05, 0.1$  and  $0.15$ ).

**Table S1.** BET specific surface areas and band gap energies of various  $\text{Sr}_2\text{Ti}_{1-x}\text{Al}_x\text{O}_4$  samples ( $x = 0, 0.05, 0.1$  and  $0.15$ ).

| Photocatalyst                                           | BET specific surface area ( $\text{m}^2 \text{g}^{-1}$ ) | Band gap energy (eV) |
|---------------------------------------------------------|----------------------------------------------------------|----------------------|
| $\text{Sr}_2\text{TiO}_4$                               | 6.729                                                    | 3.32                 |
| $\text{Sr}_2\text{Ti}_{0.95}\text{Al}_{0.05}\text{O}_4$ | 6.093                                                    | 3.20                 |
| $\text{Sr}_2\text{Ti}_{0.9}\text{Al}_{0.1}\text{O}_4$   | 5.933                                                    | 3.06                 |
| $\text{Sr}_2\text{Ti}_{0.85}\text{Al}_{0.15}\text{O}_4$ | 5.797                                                    | 3.16                 |
